# Supplementary material for: Meiotic prophase roles of Rec8 in crossover recombination and chromosome structure
Source: PubMed Central journal article supplement — Nucleic Acids Res. 2016 Aug 2;44(19):9296–314. doi: 10.1093/nar/gkw682 (PMC5100558; doi:10.1093/nar/gkw682), 2016-08-02
Supplement: supp_gkw682_nar-01772-d-2015-File003.pdf [file supp_gkw682_nar-01772-d-2015-File003.pdf]

# Figure S1

**A**

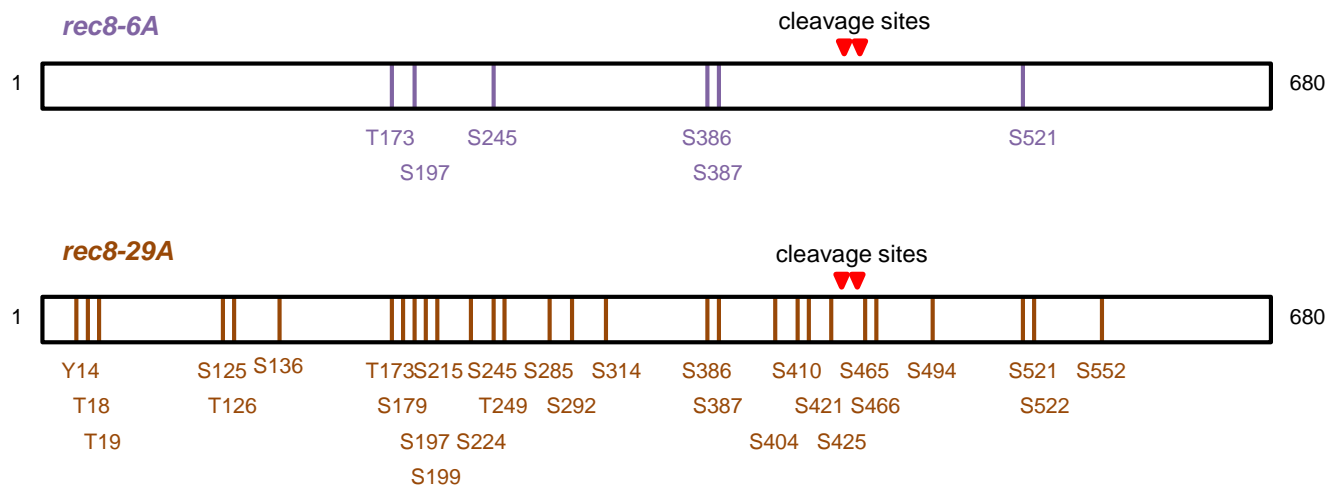

**B**

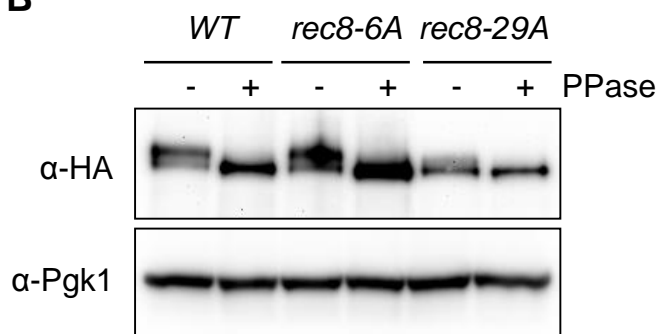

# Figure S2

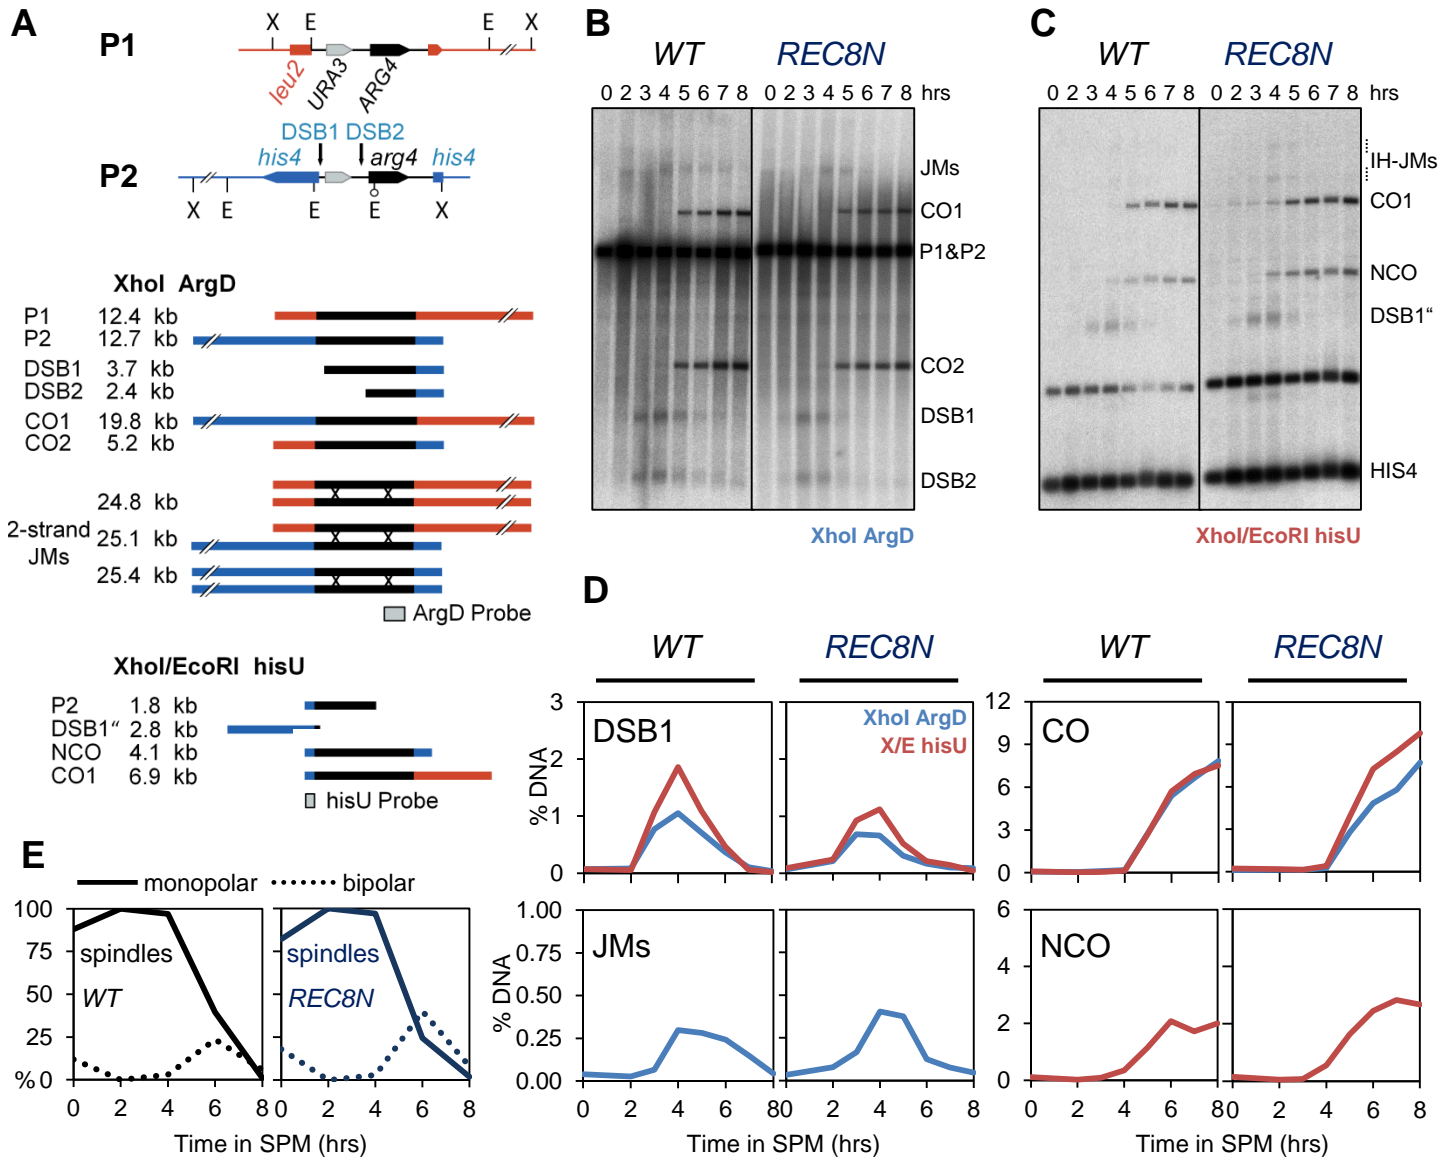

# Figure S3

**A**

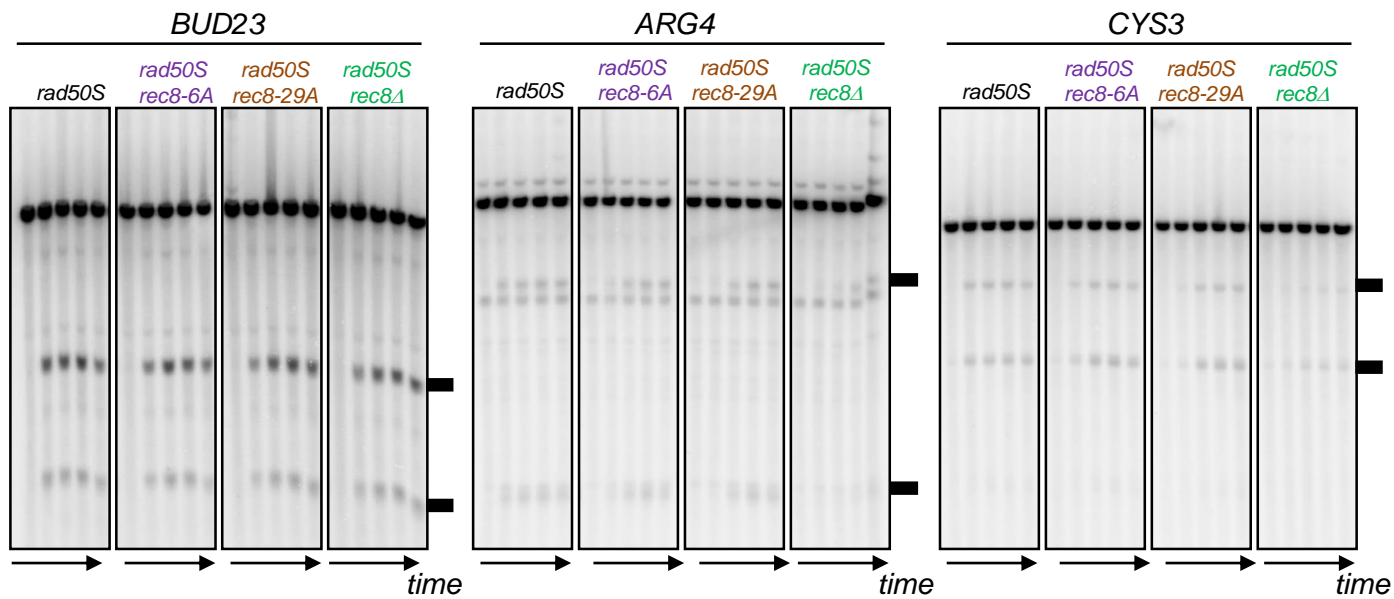

**B**

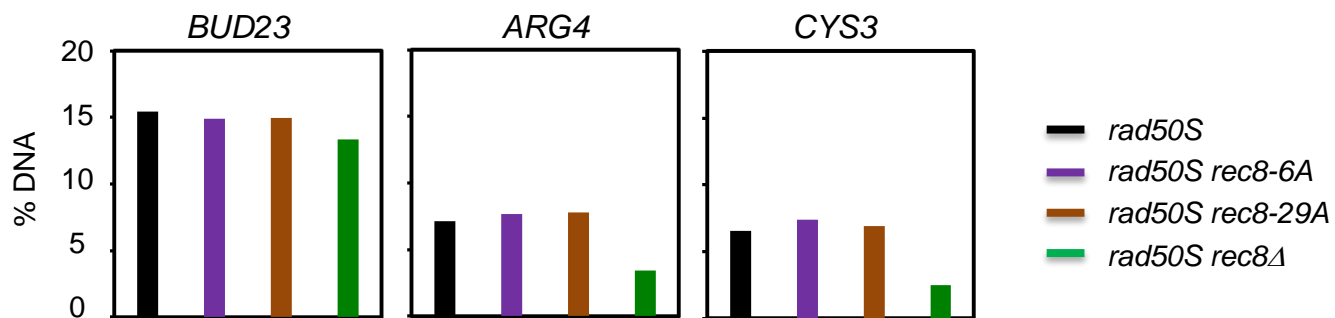

# Figure S4

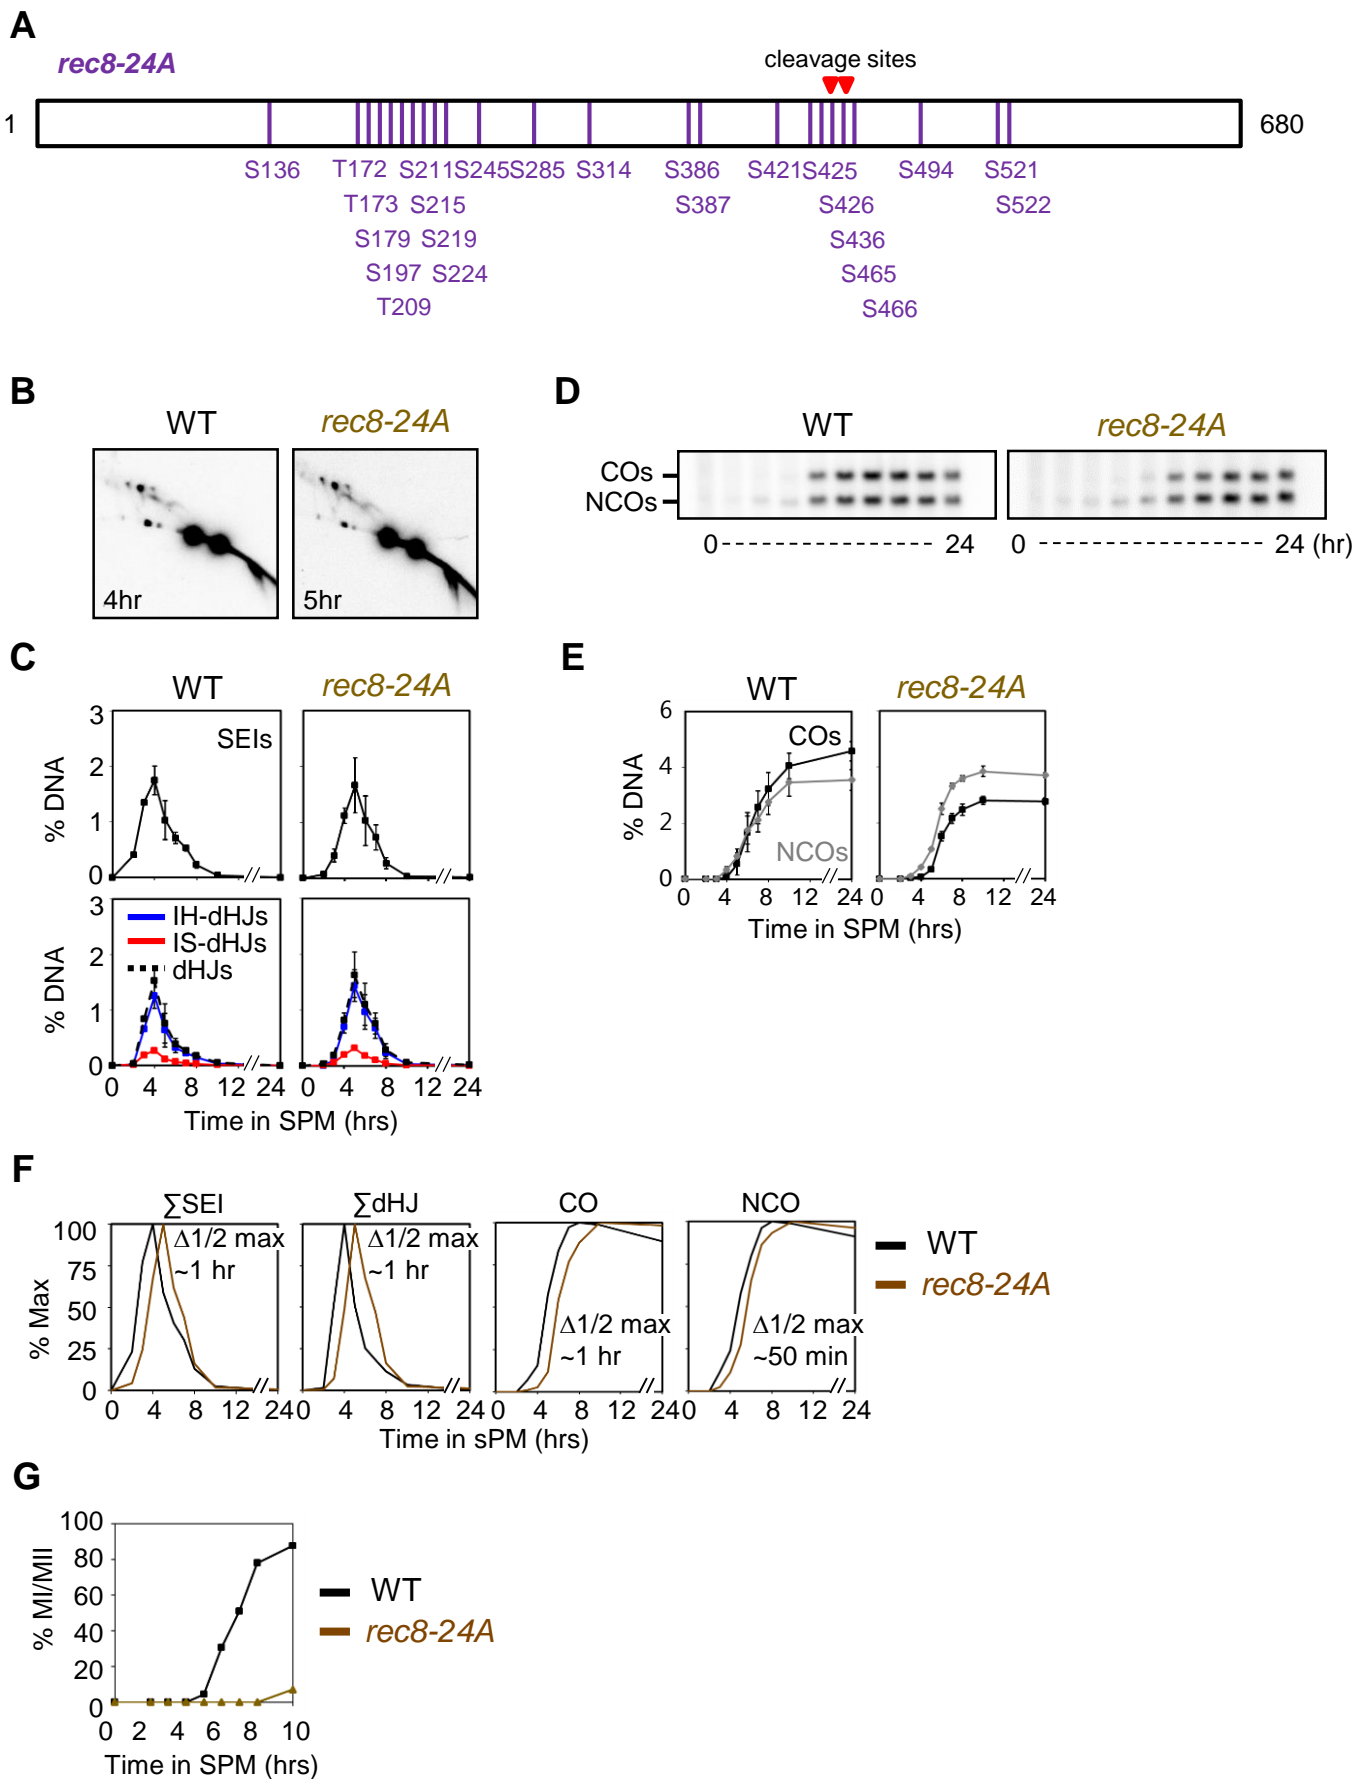

# Figure S5

**A**

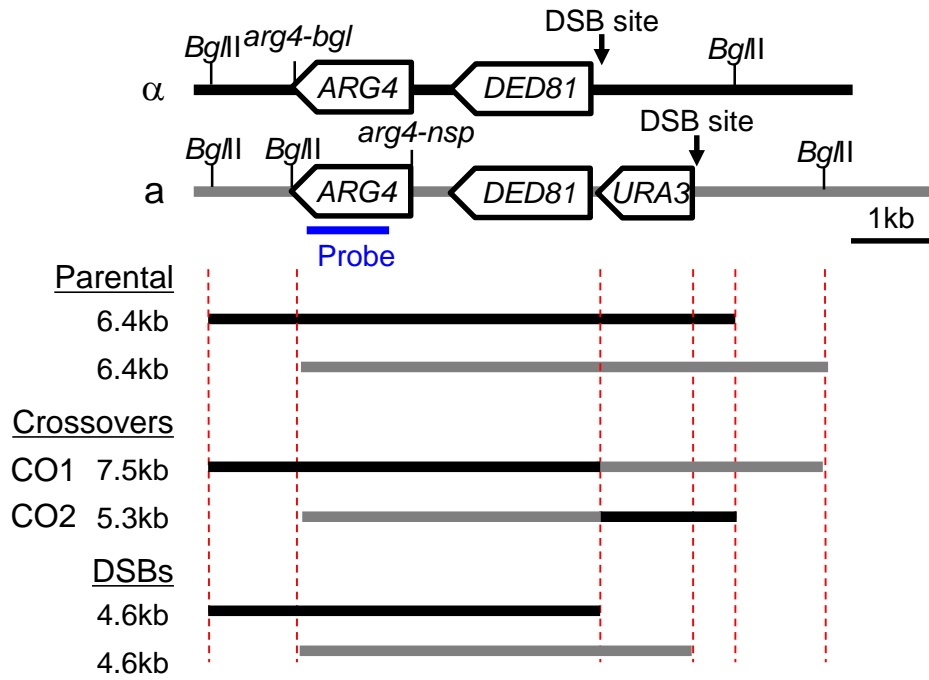

**B**

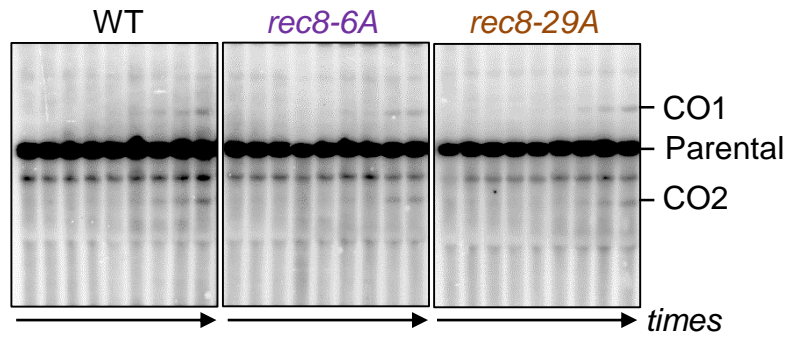

**C**

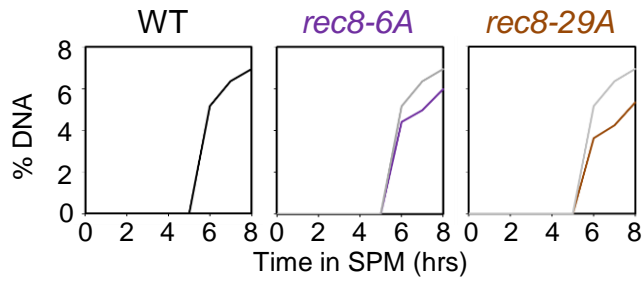

Figure S6

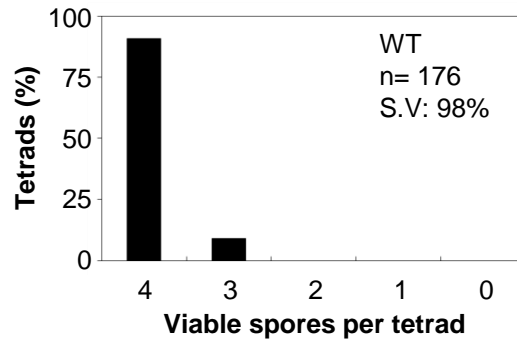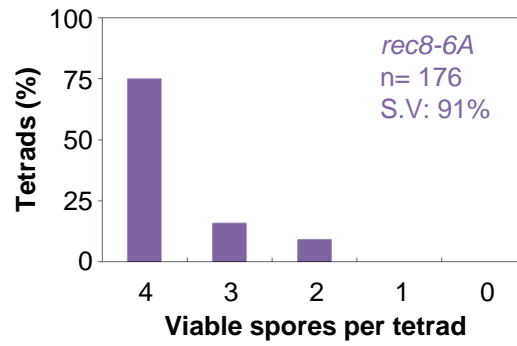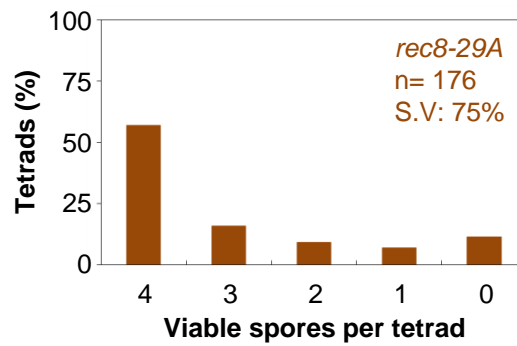

Figure S7

**A**

Mitotic cells

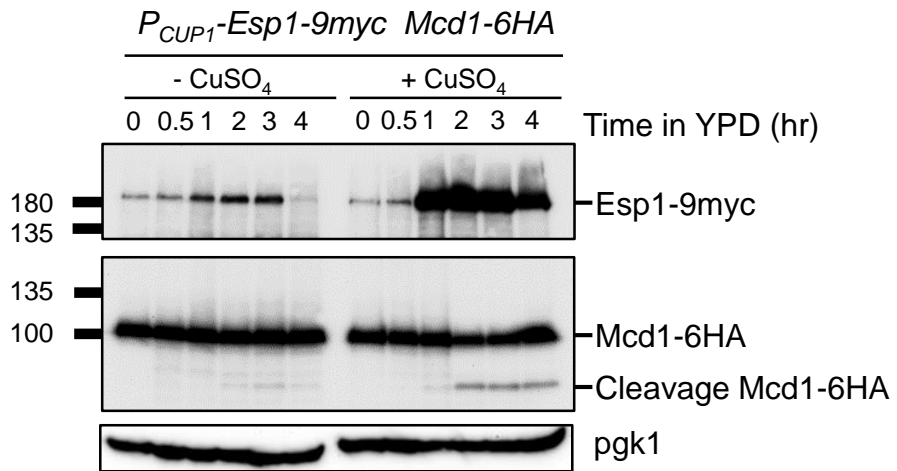

**B**

Meiotic cells

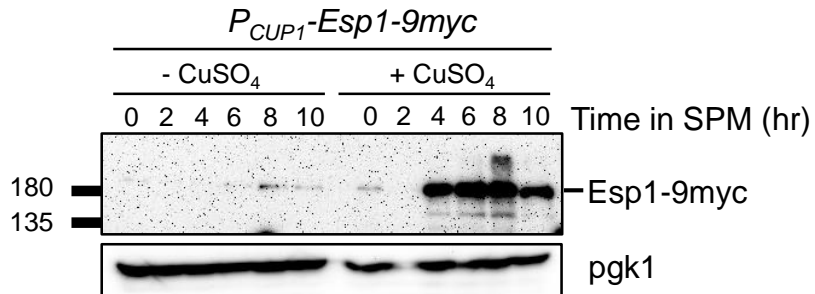

Figure S8

**A**

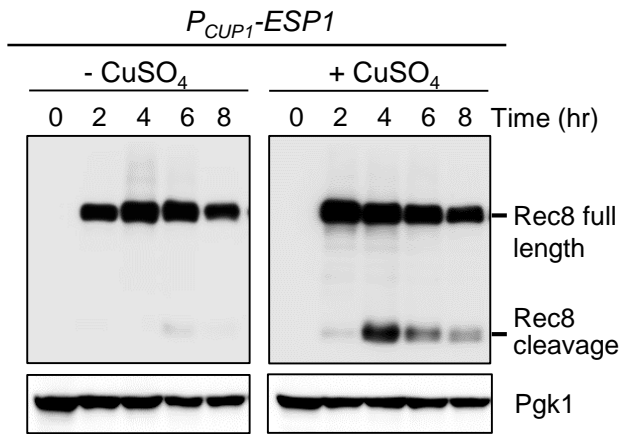

**B**

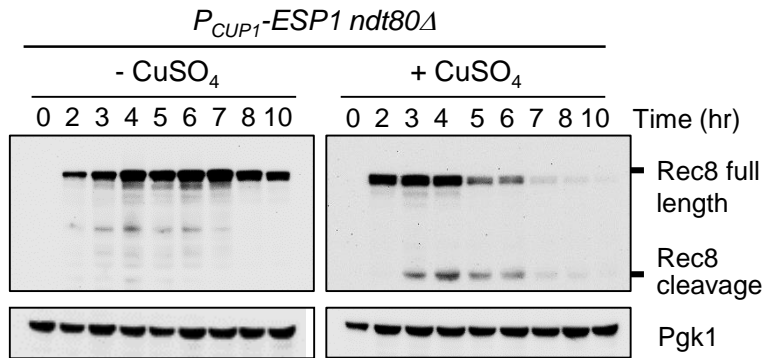

**C**

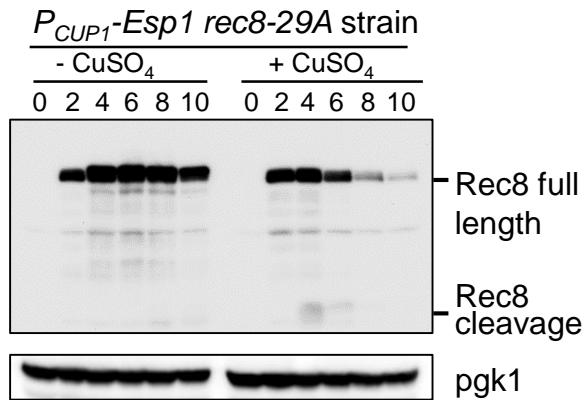

**D**

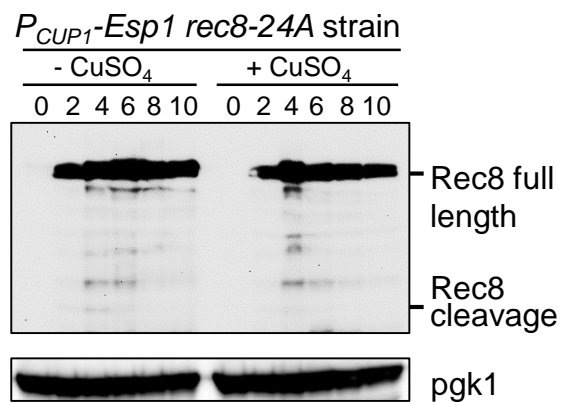



# Figure S9

**A**

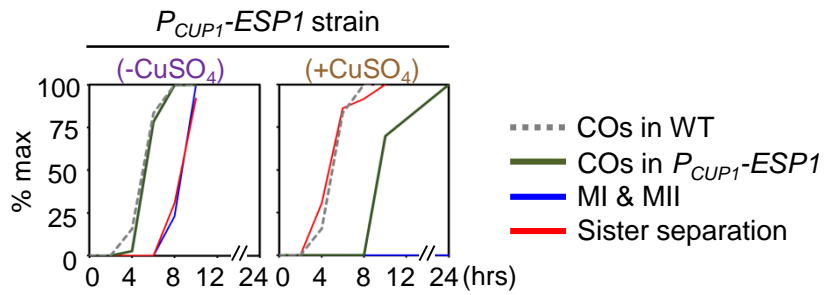

**B**

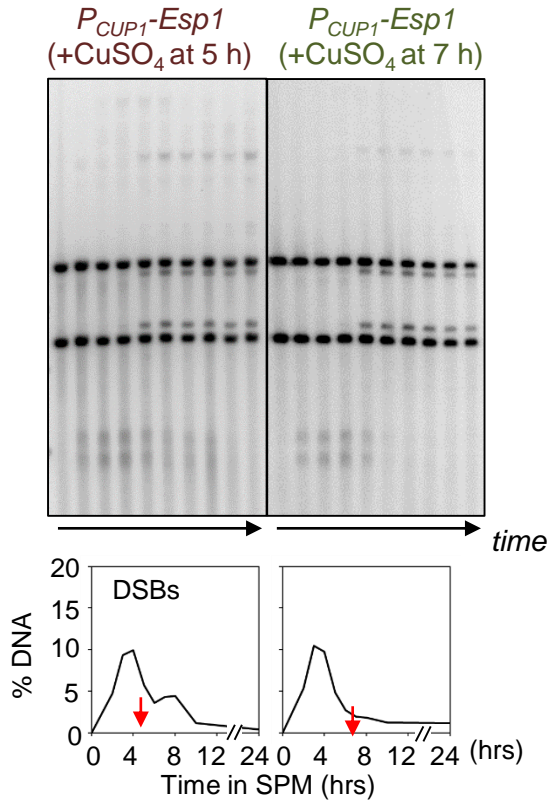

**C**

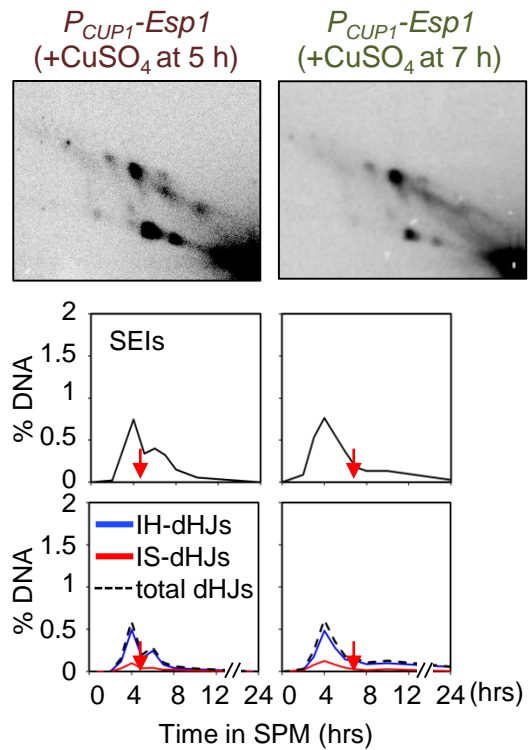

**D**

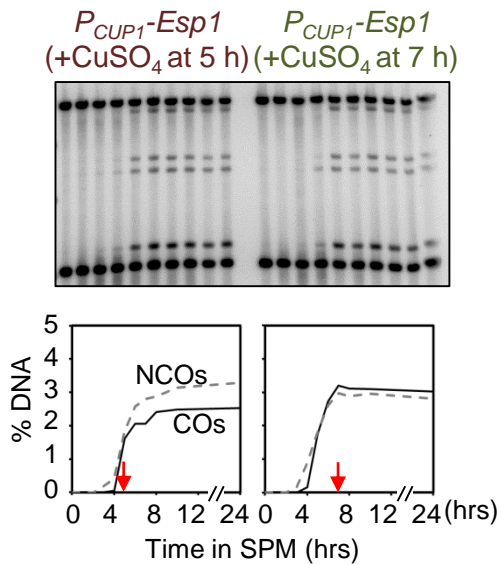

Figure S10

**A**

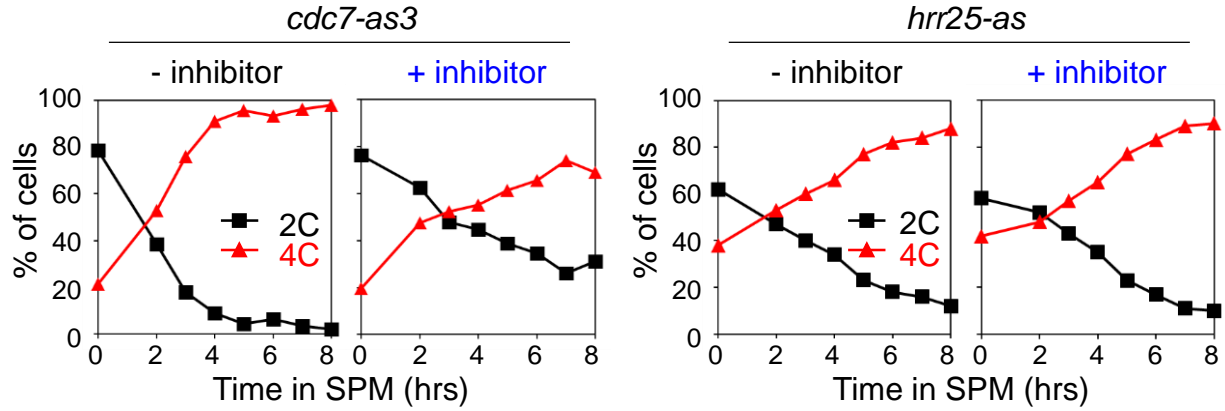

**B**

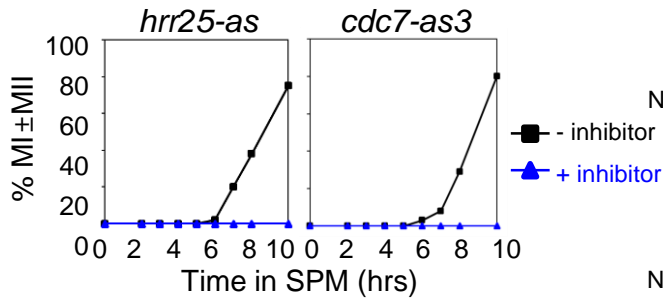

**C**

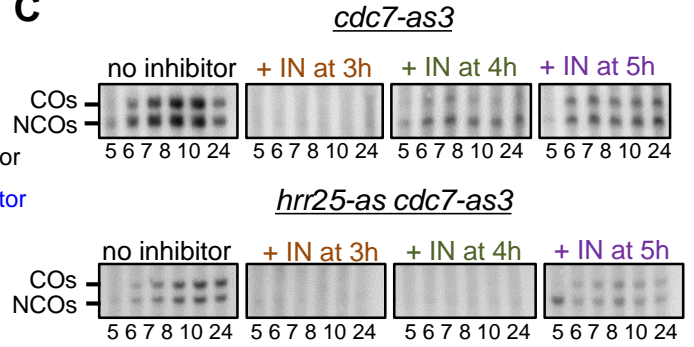

Figure S11

*ndt80* $\Delta$   $P_{CUP1}$ -*CDC5* strain

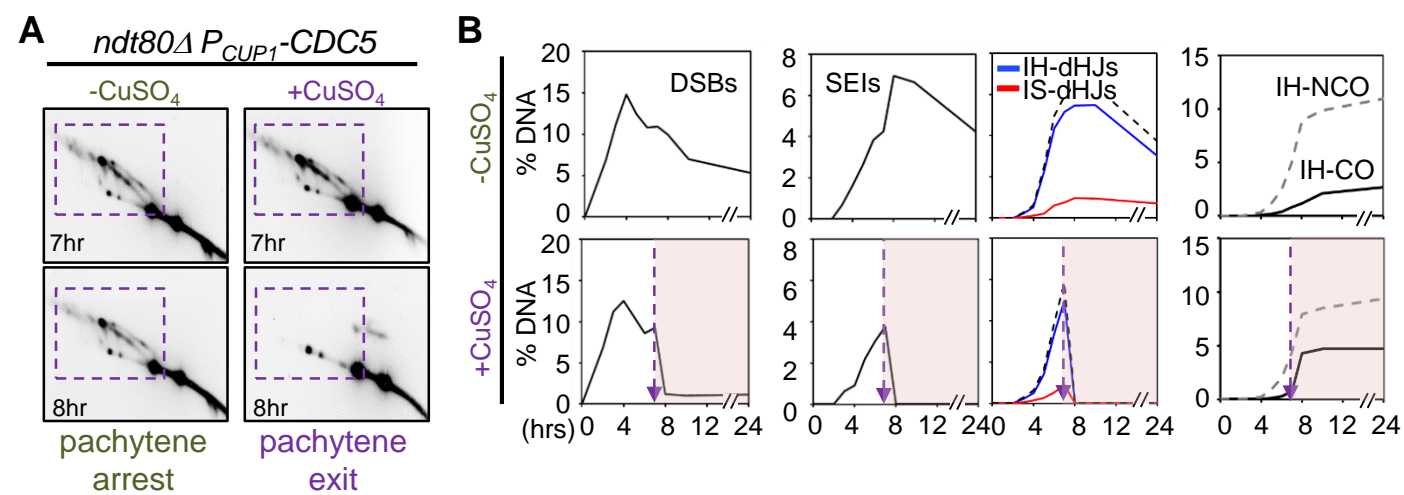

Figure S12

**A**

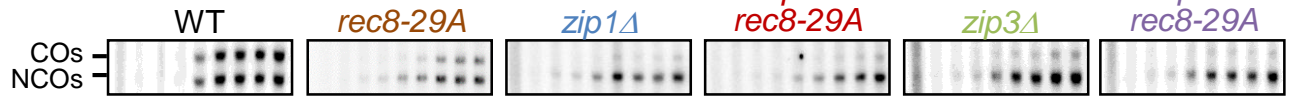

**B**

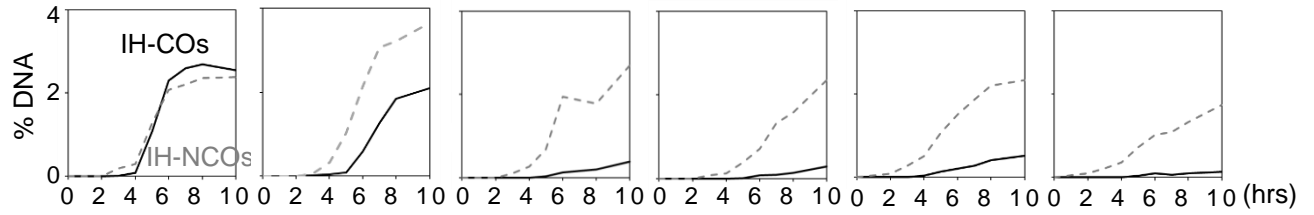

Figure S13

**A**

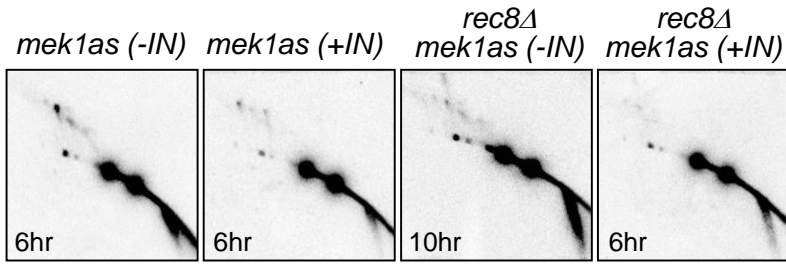

**B**

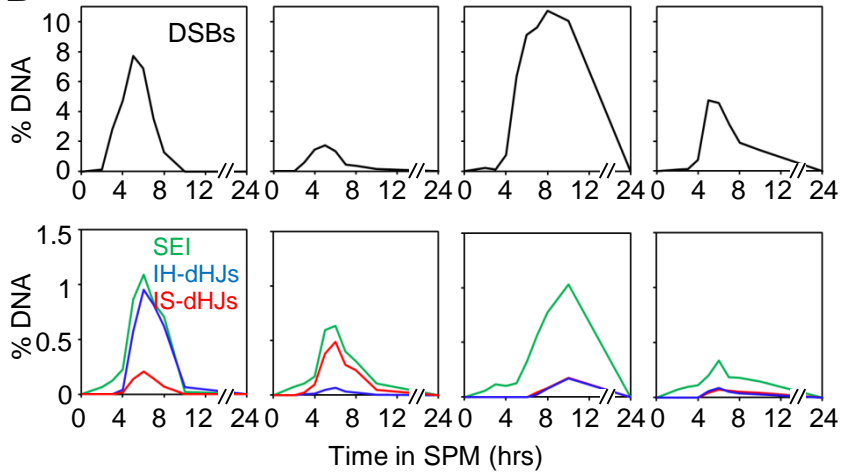

**C**

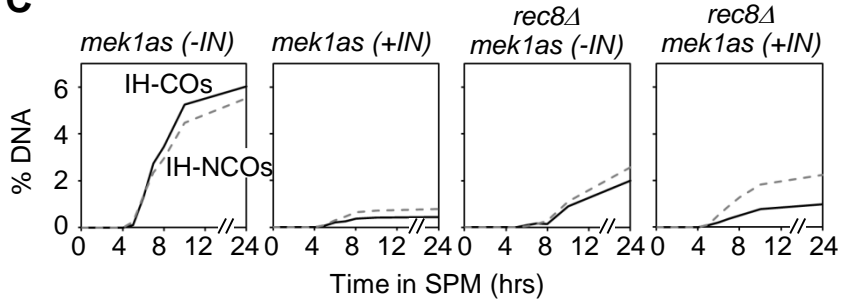

Figure S14

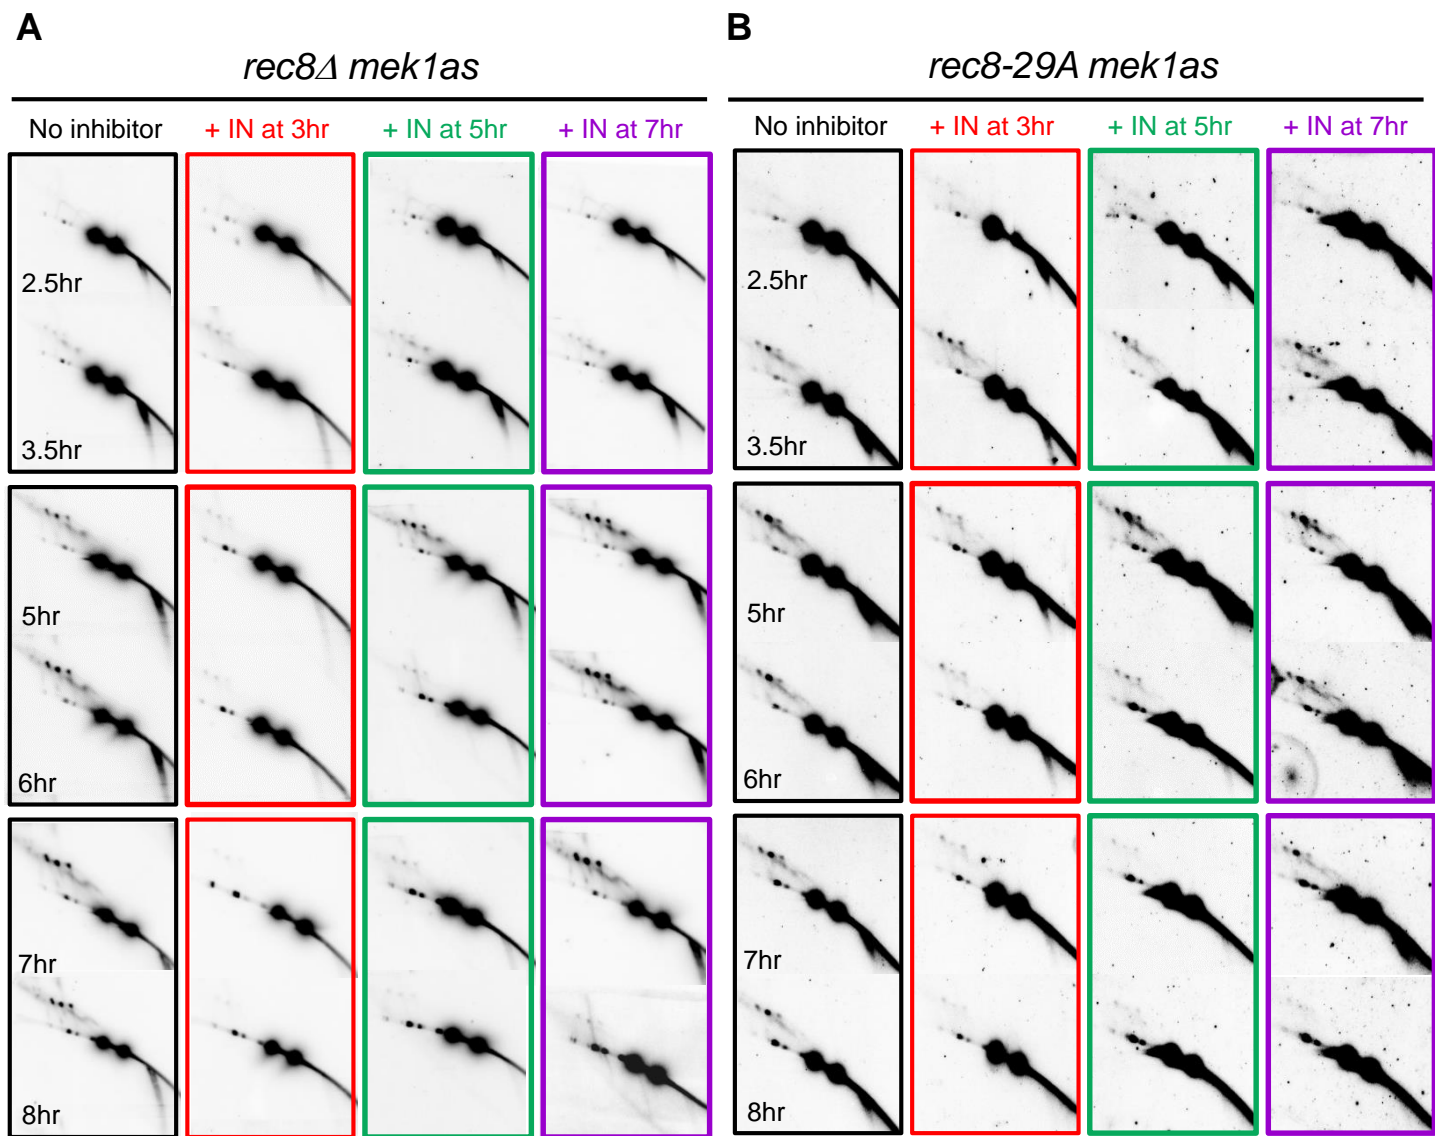

Figure S15

**A**

*rec8Δ mek1as* strain

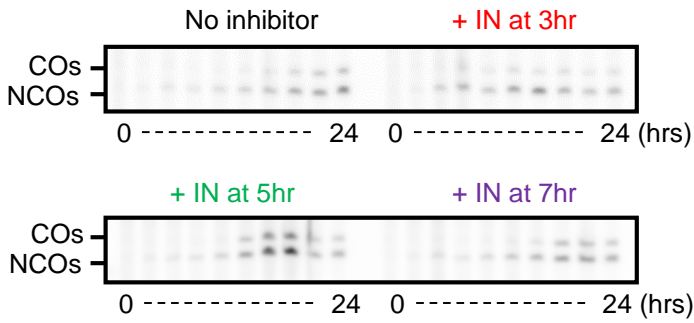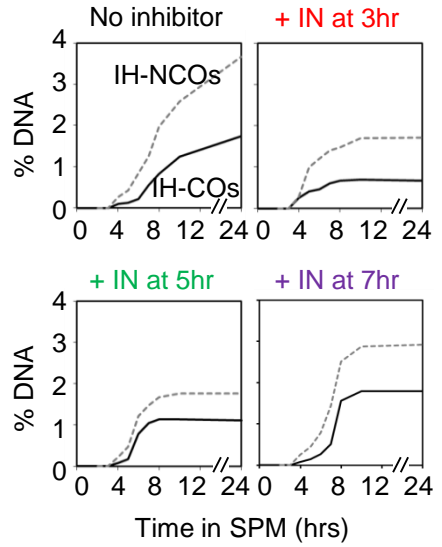

**B**

*rec8-29A mek1as* strain

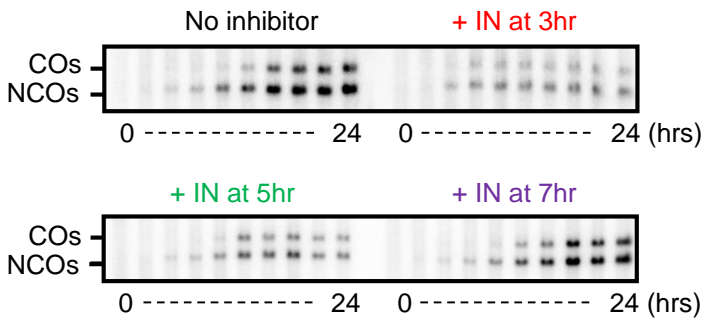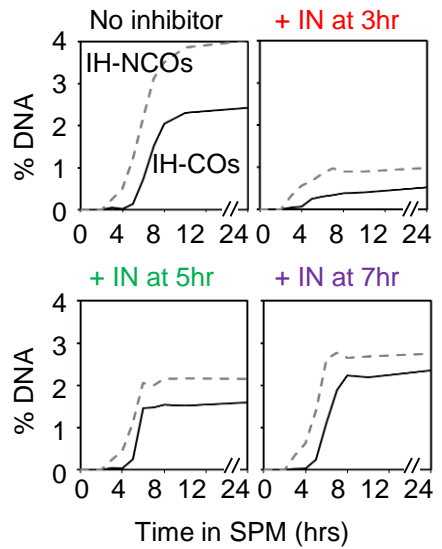

# Figure S16

All strains are *rec8-6A mek1as*

**A**

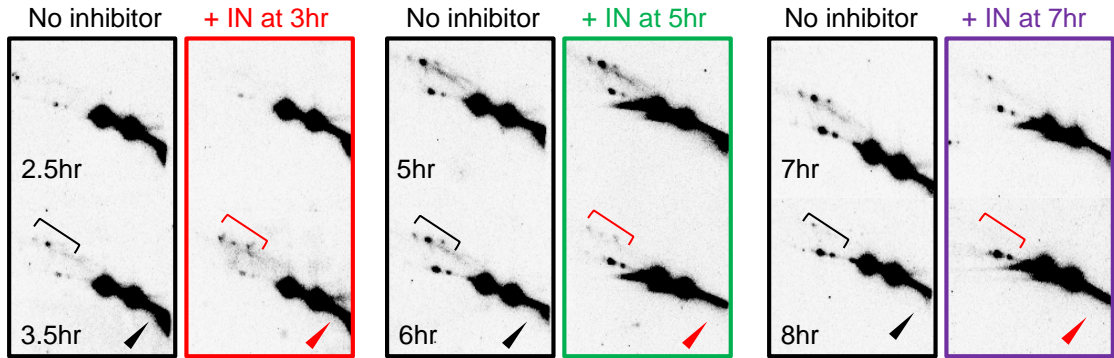

**B**

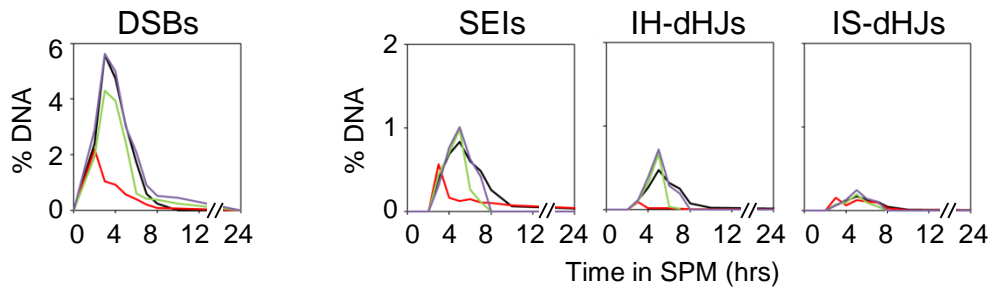

**C**

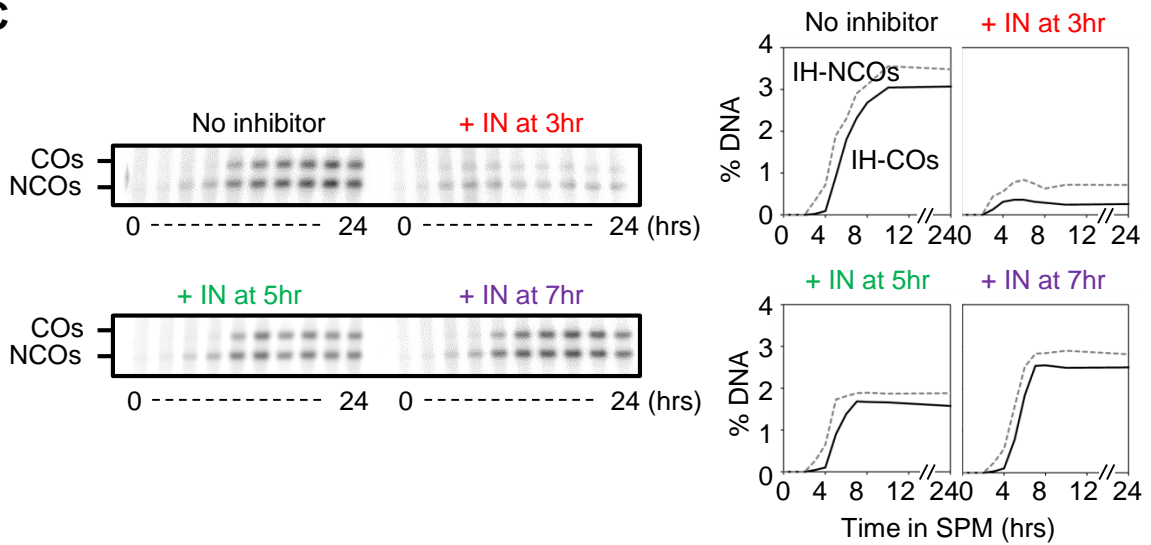



## 1 SUPPLEMENTARY FIGURE LEGENDS, REFERENCES, AND TABLE

2  
3 **Supplementary Figure S1.** Rec8 phosphorylation and mutation sites. (A) Phosphorylation  
4 sites for serines, tyrosines, and threonines in *rec8-6A* (upper panel) and *rec8-29A* (bottom  
5 panel). (B) Immunoblot detection of Rec8 phosphorylation in protein extracts from WT, *rec8-*  
6 *6A*, and *rec8-29A* strains. Meiotic cells were harvested at 6 h in SPM cultures. P<sub>gk1</sub> was  
7 served as a loading control. PPase, protein phosphatase.

8  
9 **Supplementary Figure S2.** Physical analysis of meiotic recombination in the Rec8 non-  
10 cleavable (*rec8N*) strain. (A) *URA3-arg4* recombination reporter system. Diagrams showing  
11 loci carrying the *URA3-ARG4* and *URA3-arg4EcPaI9* reporter construct, as well as  
12 characteristic species detected by Southern blotting against *XhoI* or *XhoI/EcoRI*-digested  
13 meiotic DNA with *ArgD* or *hisU*-specific probes, respectively. (B) *XhoI ArgD* Southern blots  
14 with meiotic time-course samples from WT and *REC8N* strains containing the *URA3-arg4*  
15 reporter. (C) *his4::URA3-arg4* parent specific *XhoI/EcoRI hisU* Southern blots on the same  
16 DNA samples that were assayed in panel B. The DSB1 fragment ran at ~2.8kb due to the  
17 DSB1 proximal *EcoRI* site being rendered single stranded and thus recalcitrant to cleavage  
18 by *EcoRI*, with the next *EcoRI* site located 2.7kb upstream. The intact *HIS4* locus on the  
19 parent one chromosome was observed as a 0.6kb band. (D) Quantification of recombination  
20 intermediates and products of WT and *REC8N*. Blue: obtained from *XhoI ArgD* assays. Red:  
21 obtained from *XhoI/EcoRI* assays. *XhoI ArgD* intermediates were quantified against the sum  
22 of parent 1, parent 2, and derived species, and *XhoI/EcoRI* intermediates were quantified  
23 against *HIS4*. CO *XhoI ArgD* is the sum of CO1+CO2, CO *XhoI/EcoRI hisU* is CO1. (E)  
24 Meiotic progression in the time-course experiments assayed by Southern blotting. Exit from  
25 prophase I was assayed by following the spindle morphology via whole-cell immuno-staining  
26 through the meiotic time course. The solid line shows the fraction of cells with a monopolar

27 spindle, and the dashed line shows the fraction of bipolar spindles of meiosis I, indicating the  
28 transition from prophase I to metaphase I. One hundred cells were assayed per time point,  
29 except for t = 6h SPM with n = 200 - 300.

30

31 **Supplementary Figure S3.** DSB formation in the various loci. (A) 1D gel analysis of DSB  
32 formation at *BUD23*, *ARG4*, and *CYS3* loci. (B) Quantitative of DSB shown in (A).

33

34 **Supplementary Figure S4.** Meiotic recombination in the *rec8-24A* strain. (A) Serine and  
35 threonine phosphorylation sites in *rec8-24A*. (B) Southern blot of native/native two-  
36 dimensional (2D) gel images showing JMs. (C) Quantification of SEIs and dHJs in WT and  
37 *rec8-24A* cells (mean  $\pm$  SEM, for three cultures). (D) One-dimensional (1D) gel analysis of  
38 interhomolog crossover (IH-CO) and interhomolog non-crossover (IH-NCO) formation. (E)  
39 Quantitative analysis of IH-CO and IH-NCO formation (mean  $\pm$  SEM, for three cultures). (F)  
40 Comparison of maximal peak joint molecule (JM) and recombinant levels in WT and *rec8-*  
41 *24A* cells.  $\Delta 1/2$  max is the time difference between the maximum values in WT and *rec8-24A*.  
42 (G). Meiotic division (% MI $\pm$ MII) in WT and *rec8-24A* strains.

43

44 **Supplementary Figure S5.** Analysis of crossover at *ARG4*. (A) Genetic map of the *ARG4*  
45 locus and Southern blot probe (Goyon and Lichten, 1993). DNA species after digestion with  
46 *Bgl*III were indicated. (B) Southern blot images of crossover analysis in WT and *Rec8*  
47 phospho-mutant strains. Time points are 0, 2.5, 3.5, 4, 5, 6, 7, and 8 hours. (C)  
48 Quantification of CO1 and CO2 at *ARG4* locus. Grey lines in *rec8-6A* and *rec8-29A* plots  
49 indicate COs of WT.

50

51 **Supplementary Figure S6.** Analysis of spore viability in WT and *rec8* phospho-mutant

52 strains. The population of tetrads for each strain with indicated viable spores (four, three,  
53 two, one and zero) was scored and exhibited as specified colors (WT, black; *rec8-6A*, purple;  
54 *rec8-29A*, brown). The vertical and horizontal axes represent the population of each  
55 dissected tetrad and the number of viable spores per one tetrad, respectively (n, the total  
56 number of dissected tetrads; S.V, the % of spore viability).

57

58 **Supplementary Figure S7.** Esp1 expression under the control of *CUP1* promoter in mitotic  
59 cells and meiotic cells. (A) Cells were synchronized in SPS for 18 hr at 30 °C incubator. The  
60 synchronized cells were then resuspended with YPD medium. Esp1 expression was induced  
61 by the addition of 50 μM CuSO<sub>4</sub> at 30 min after transferring the *P<sub>CUP1</sub>-ESP1* strain to YPD.  
62 (B) Cells were synchronized in SPS medium as shown in (A). The cultures were transferred  
63 in SPM medium to initiate meiosis. Then, to express Esp1, 50 μM CuSO<sub>4</sub> was added to the  
64 culture at 2 hr after transferring the *P<sub>CUP1</sub>-ESP1* strain to SPM.

65

66 **Supplementary Figure S8.** Rec8 cleavage by ectopic expression of Esp1 in *NDT80*,  
67 *ndt80Δ*, *rec8-29A*, and *P<sub>CUP1</sub>-Esp1 rec8-24A* strains. (A) Ectopic expression of Esp1 induces  
68 Rec8 cleavage during meiosis. Extracts were prepared from meiotic *P<sub>CUP1</sub>-ESP1* cells in the  
69 presence (right panel, t = 2 hr) or absence (left panel) of CuSO<sub>4</sub>. (B) Ectopic expression of  
70 Esp1 induces Rec8 cleavage before pachytene exit. Protein extracts were prepared from  
71 *ndt80Δ P<sub>CUP1</sub>-ESP1* cells in the presence (right panel, t = 2hr) or absence (left panel) of  
72 CuSO<sub>4</sub>. (C and D) Rec8 cleavage in *P<sub>CUP1</sub>-Esp1 rec8-29A* and *P<sub>CUP1</sub>-Esp1 rec8-24A*.  
73 Protein extracts were prepared from meiotic *P<sub>CUP1</sub>-ESP1 rec8-29A* (C) and *P<sub>CUP1</sub>-ESP1 rec8-*  
74 *29A* (D) cells in the presence (right panel, t = 2 hr) or absence (left panel) of CuSO<sub>4</sub> and  
75 Rec8-3HA proteins were detected using anti-HA antibody by western blotting.

76

77 **Supplementary Figure S9.** Analysis of meiotic recombination in *P<sub>CUP1</sub>-Esp1* cells. (A)  
78 Normalized curves to compare the timing of CO, meiotic division, and sister separation from  
79 the analysis shown in Figure 2B and Figure 4. Dashed lines indicate crossover kinetics of  
80 WT. (B) 1D gel analysis of DSB formation. (C) 2D gel analysis of SEI and dHJ formation. (D)  
81 Analysis of IH-COs and IH-NCOs.

82

83 **Supplementary Figure S10.** DNA replication and meiotic division curves in in *hrr25-as* and  
84 *cdc7-as3* mutant strains (A) DNA replication in *hrr25-as* and *cdc7-as3* mutant strains in the  
85 presence or absence of chemical inhibitor. (B) Meiotic division in *hrr25-as* and *cdc7-as3*  
86 strains in the presence or absence of chemical inhibitor. (C) Southern analysis of COs and  
87 NCOs at *HIS4LEU2*.

88

89 **Supplementary Figure S11.** Rec8 cleavage at early prophase I exhibits defects in meiotic  
90 recombination. Representative southern blot images of 2D gel analysis and quantification of  
91 JM levels. (A) Representative 2D gel images for *ndt80Δ P<sub>CUP1</sub>-CDC5* strain in the presence  
92 or absence of CuSO<sub>4</sub>. 50 μM CuSO<sub>4</sub> was added directly to one of the two cultures at 7h, and  
93 the cultures were then analyzed in parallel through meiosis to compare directly -Cdc5 (-  
94 CuSO<sub>4</sub>) and +Cdc5 (+CuSO<sub>4</sub>) results. (B) Quantitative analysis of DSBs, SEIs, dHJs, IH-  
95 COs, and IH-NCOs. IH-CO and IH-NCO products were evaluated by *XhoI* and *NgoMIV*  
96 restriction polymorphisms (See Figure 1D). Vertical dash lines indicate the time of CuSO<sub>4</sub>  
97 addition.

98

99 **Supplementary Figure S12.** Formation of crossover and non-crossover in WT, *rec8-29A*,  
100 *zip1Δ*, *zip1Δ rec8-29A*, *zip3Δ*, *zip3Δ rec8-29A* mutants. (A) Southern blot images of  
101 crossover and non-crossover analysis in indicated strains. (B) Quantification of crossover

102 and non-crossover.

103

104 **Supplementary Figure S13.** Analysis of JMs in *mek1as* and *rec8Δ mek1as* mutants at 23  
105 °C in the presence or absence of 1-NA-PP1. For 23 °C experiments, pre-meiotic cultures  
106 (SPS) were transferred to SPM medium to 30 °C; then after 2.5hr, meiotic cultures were shift  
107 to 23 °C incubator. (A) Representative 2D-gel images of JMs. (B) Quantitation analysis for  
108 DSBs and JMs. (C) Quantification analysis of IH-COs and -IHNCOs.

109

110 **Supplementary Figure S14.** Southern blot analysis of two-dimensional (2D) gels of  
111 samples taken during progression through meiosis. (A and B) The gel images show JM  
112 analysis of *rec8Δ mek1as* and *rec8-29A mek1as* strain in the presence or absence of Mek1  
113 kinase inhibitor at the indicated times.

114

115 **Supplementary Figure S15.** Formation of IH-COs and IH-NCOs is dependent on Mek1  
116 kinase inactivation. (A) Analysis of IH-CO and IH-NCO formation in the *rec8Δ mek1as* strain.  
117 Representative images of COs and NCOs (left panel) and the corresponding quantitation  
118 data (right panel). (B) Patterns of IH-CO and IH-NCO formation in the *rec8-29A mek1as*  
119 strain. Representative images of IH-COs and IH-NCOs (left panel) and corresponding  
120 quantitation data (right panel).

121

122 **Supplementary Figure S16.** Analysis of recombination patterns with the *rec8-6A mek1as*  
123 strain. (A) Representative images from a 2D-gel of *rec8-6A mek1as* in the presence or  
124 absence of 1-NA-PP1 at the indicated time points. Square brackets and arrowheads denote  
125 JMs and DSBs, respectively. (B) Quantification analysis of recombination intermediates in  
126 the *rec8-6A mek1as* strain shown in panel A. (C) Patterns of IH-CO and IH-NCO formation.  
127 Representative images of IH-COs and IH-NCOs (left panel) and corresponding quantitation

128 data (right panel).

129

130 **Supplemental Reference**

131 Goyon, C. and Lichten, M. (1993) Timing of molecular events in meiosis in *Saccharomyces*  
132 *cerevisiae*: stable heteroduplex DNA in formed late in meiotic prophase. *Mol. Cell. Biol.*, **13**, 373-382.

133

134

135

136

137

138

139

140

141

142

143

144

145

146

147

148

149

150

151

152

153 Supplementary Table 1. Yeast strains used in this study.

| Strain† | Genotype‡                                                                                                                   |
|---------|-----------------------------------------------------------------------------------------------------------------------------|
| KKY276  | <i>MATa/MATα HIS4::LEU2-(BamHI)/his4x::LEU2-(NgoMIV)--URA3</i>                                                              |
| KKY109  | <i>MATa/MATα HIS4::LEU2-(BamHI)/his4-x::LEU2-(NgoMIV)--URA3, rad50s::URA3"</i>                                              |
| KKY110  | <i>MATa/MATα HIS4::LEU2-(BamHI)/his4-x::LEU2-(NgoMIV)--URA3, rad50s::URA3"</i> , <i>rec8Δ::KanMX4"</i>                      |
| KKY1784 | <i>MATa/MATα HIS4::LEU2-(BamHI)/his4-x::LEU2-(NgoMIV)--URA3, rec8Δ::KanMX4::rec8-6A-3HA::LEU2"</i> , <i>rad50s::URA3"</i>   |
| KKY1744 | <i>MATa/MATα HIS4::LEU2-(BamHI)/his4-x::LEU2-(NgoMIV)--URA3, rec8Δ::KanMX4::rec8-29A-3HA::LEU2"</i> , <i>rad50s::URA3"</i>  |
| KKY179  | <i>MATa/MATα HIS4::LEU2-(BamHI)/his4-x::LEU2-(NgoMIV)--URA3, rec8Δ::KanMX4::rec8-6A-3HA::LEU2"</i>                          |
| KKY173  | <i>MATa/MATα HIS4::LEU2-(BamHI)/his4-x::LEU2-(NgoMIV)--URA3, rec8Δ::KanMX4::rec8-29A-3HA::LEU2"</i>                         |
| KKY1080 | <i>MATa/MATα HIS4::LEU2(BamHI)/his4-x::LEU2-(NgoMIV)—URA3, rec8Δ::KanMX4"</i>                                               |
| KKY1933 | <i>MATa/MATα HIS4::LEU2-(BamHI)/his4-x::LEU2-(NgoMIV)--URA3, ndt80Δ::KanMX4"</i> , <i>KanMX6-pCUP1-3HA-CDC5</i>             |
| KKY2029 | <i>MATa/MATα HIS4::LEU2-(BamHI)/his4-x::LEU2-(NgoMIV)—URA3, ZIP3-13myc::HygB/ZIP3</i>                                       |
| KKY2030 | <i>MATa/MATα HIS4::LEU2-(BamHI)/his4x::LEU2-(NgoMIV)—URA3, ZIP3-13myc::HygB/ZIP3, rec8Δ::KanMX4"</i>                        |
| KKY2031 | <i>MATa/MATα HIS4::LEU2-(BamHI)/his4x::LEU2-(NgoMIV)—URA3, ZIP3-13myc::HygB/ZIP3, rec8Δ::KanMX4::rec8-6A::LEU2"</i>         |
| KKY2032 | <i>MATa/MATα HIS4::LEU2-(BamHI)/his4x::LEU2-(NgoMIV)—URA3, ZIP3-13myc::HygB/ZIP3, rec8Δ::KanMX4::rec8-29A::LEU2"</i>        |
| KKY1053 | <i>MATa/MATα HIS4::LEU2-(BamHI)/his4-x::LEU2-(NgoMIV)--URA3, zip1Δ::KanMX4"</i>                                             |
| KKY1642 | <i>MATa/MATα HIS4::LEU2-(BamHI)/his4x::LEU2-(NgoMIV)--URA3, zip1Δ::KanMX4"</i> , <i>rec8Δ::KanMX4::rec8-29A-3HA::LEU2"</i>  |
| KKY1054 | <i>MATa/MATα HIS4::LEU2-(BamHI)/his4-x::LEU2-(NgoMIV)--URA3, zip3Δ::KanMX4"</i>                                             |
| KKY1650 | <i>MATa/MATα HIS4::LEU2-(BamHI)/his4-x::LEU2-(NgoMIV)--URA3, zip3Δ::KanMX4"</i> , <i>rec8Δ::KanMX4::rec8-29A-3HA::LEU2"</i> |
| KKY2278 | <i>MATa/MATα KanMX4-pCUP1-ESP1"</i> , <i>REC8-3HA::URA3"</i>                                                                |
| KKY2296 | <i>MATa/MATα URA3::CYC1p-LacI-GFP, scp1(Ch XV telomere)::LacO-LEU2, KanMX4-pCUP1-ESP1"</i>                                  |
| KKY2256 | <i>MATa/MATα HIS4::LEU2-(BamHI)/his4-x::LEU2-(NgoMIV)--URA3, KanMX4-pCUP1-ESP1"</i>                                         |
| KKY2342 | <i>MATa/MATα HIS4::LEU2-(BamHI)/his4-x::LEU2-(NgoMIVi)--URA3, REC8N-3HA::KanMX::LEU2"</i>                                   |
| KKY202  | <i>MATa/MATα HIS4::LEU2-(BamHI)/his4x::LEU2-(NgoMIV)-URA3,</i>                                                              |

|         |                                                                                                                                                                                                                 |
|---------|-----------------------------------------------------------------------------------------------------------------------------------------------------------------------------------------------------------------|
|         | <i>rec8-24SA-HA3::LEU2::rec8Δ::KanMX4</i> "                                                                                                                                                                     |
| KKY194  | <i>MATa/MATα HIS4::LEU2-(BamHI)/his4-x::LEU2-(NgoMIV)--URA3, rec8Δ::KanMX4</i> ", <i>mek1::LEU2::mek1-as1::URA3</i> "                                                                                           |
| KKY857  | <i>MATa/MATα HIS4::LEU2-(BamHI)/his4-x::LEU2-(NgoMIV)--URA3, rec8Δ::KanMX4::rec8-29A-3HA::LEU2</i> ", <i>mek1::LEU2::mek1-as1::URA3</i> "                                                                       |
| KKY197  | <i>MATa/MATα HIS4::LEU2-(BamHI)/his4-x::LEU2-(NgoMIV)--URA3, mek1::LEU2::mek1-as1::URA3</i> "                                                                                                                   |
| KKY856  | <i>MATa/MATα HIS4::LEU2-(BamHI)/his4-x::LEU2-(NgoMIV)--URA3, rec8Δ::KanMX4::rec8-6A-3HA::LEU2</i> ", <i>mek1::LEU2::mek1-as1::URA3</i> "                                                                        |
| KKY2324 | <i>MATa/MATα HIS4::LEU2-(BamHI)/his4-x::LEU2-(NgoMIV)—URA3, pCUP1-KanMX-Esp1</i> ", <i>REC8-3HA::URA3</i> ", <i>ndt80Δ::KanMX4</i> "                                                                            |
| FKY3061 | <i>MATa/MATα ho::LYS2</i> ", <i>lys2</i> ", <i>arg4Δ(eco47III-hpa1)</i> ", <i>leu2-R/leu2-RV::URA3-(Sma1-Eco47III)-ARG4, his4Δ (Sal1-Cla1)::URA3-Δ (Sma1-Eco47III)-arg4-EcPal(1691)/HIS4, REC8N-HA3::LEU2</i> " |
| FKY3108 | <i>MATa/MATα ho::LYS2</i> ", <i>lys2</i> ", <i>arg4Δ (eco47III-hpa1)</i> ", <i>leu2-R/leu2-RV::URA3-(Sma1-Eco47III)-ARG4, his4Δ (Sal1-Cla1)::URA3-Δ (sma1-eco47III)-arg4-EcPal(1691)/HIS4</i>                   |
| KKY2278 | <i>MATa/MATα pCUP1-KanMX-Esp1</i> ", <i>REC8-3HA::URA3</i> "                                                                                                                                                    |
| KKY2324 | <i>MATa/MATα pCUP1-KanMX-Esp1</i> ", <i>REC8-3HA::URA3</i> ", <i>ndt80Δ::KanMX4</i> "                                                                                                                           |
| KKY1603 | <i>MATa/MATα HIS4::LEU2-(BamHI) / his4-x::LEU2-(NgoMIV)--URA3, pCUP1-KanMX-ESP1</i> ", <i>rec8Δ::KanMX4::Rec8-29A::LEU2</i> "                                                                                   |
| KKY1597 | <i>MATa/MATα HIS4::LEU2-(BamHI) / his4-x::LEU2-(NgoMIV)--URA3, pCUP1-KanMX-ESP1</i> ", <i>Rec8-24SA-HA3::LEU2</i> ", <i>rec8Δ::KanMX4</i> ",                                                                    |
| KKY2420 | <i>MATa/MATα pCUP1-KanMX-ESP1-9myc-Hyg</i> ", <i>MCD1-6HA-KanMX</i> "                                                                                                                                           |
| KKY2378 | <i>MATa/MATα HIS4::LEU2-(BamHI) / his4-x::LEU2-(NgoMIV)--URA3, cdc7-as3-myc</i> "                                                                                                                               |
| KKY2500 | <i>MATa/MATα HIS4::LEU2-(BamHI) / his4-x::LEU2-(NgoMIV)--URA3, Hrr25-as1-HIS3::hrr25Δ::KanMX4</i> "                                                                                                             |
| KKY2649 | <i>MATa/MATα HIS4::LEU2-(BamHI) / his4-x::LEU2-(NgoMIV)-URA3, cdc7-as3-myc</i> ", <i>Hrr25-as1-HIS3::hrr25Δ::KanMX4</i> "                                                                                       |
| KKY2471 | <i>MATa/MATα arg4-bgIII (nsp-) / arg4-nsp (nsp-), DED82-URA3-DED81</i>                                                                                                                                          |
| KKY2490 | <i>MATa/MATα arg4-bgIII (nsp-) / arg4-nsp (nsp-), DED82-URA3-DED81, rec8Δ::KanMX4::Rec8-6A::LEU2</i> "                                                                                                          |
| KKY2491 | <i>MATa/MATα arg4-bgIII (nsp-) / arg4-nsp (nsp-), DED82-URA3-DED81, rec8Δ::KanMX4::Rec8-29A::LEU2</i> "                                                                                                         |

154 † All strains are isogenic derivatives of SK1 background.

155 ‡ All strains are also homozygous for the mutation *ho::hisG* and *leu2::hisG* (except FKY strains), and  
156 for *ura3 (ΔPstI-SmaI)*.



157

158 Supplementary Table 2. Summary of mutant phenotypes in meiotic recombination

| Genotypes                                  | Relative <i>rad50S</i> DSB level | DSB hyperresection | IH:IS dHJ ratio <sup>a</sup> | CO level <sup>b</sup> | NCO level <sup>b</sup> | CO:NCO ratio | DSB timing | post-DSB progression |
|--------------------------------------------|----------------------------------|--------------------|------------------------------|-----------------------|------------------------|--------------|------------|----------------------|
| WT                                         | = 1                              | = wt; normal       | 5.35:1                       | 4.1                   | 3.7                    | 1.11:1       | = wt       | = wt                 |
| <i>pCUP1-ESP1</i> [no CuSO <sub>4</sub> ]  | not tested                       | = wt               | 4.8:1                        | 3.9                   | 3.5                    | 1.12:1       | = wt       | = wt                 |
| <i>rec8Δ</i>                               | ~0.8                             | modest             | 1.04:1                       | 1.26                  | 3.15                   | 0.42:1       | delay      | delay                |
| <i>pCUP1-ESP1</i> +CuSO <sub>4</sub> [2hr] | not tested                       | modest             | 1.3:1                        | 1.66                  | 2.4                    | 0.68:1       | delay      | delay                |
| <i>rec8-6A</i>                             | ~1                               | = wt               | 4.4:1                        | 3.4                   | 3.7                    | 0.93:1       | = wt       | delay                |
| <i>rec8-24A</i>                            | ~1                               | = wt               | 4.1:1                        | 2.8                   | 3.7                    | 0.75:1       | = wt       | delay                |
| <i>rec8-29A</i>                            | ~1                               | = wt               | 2.5:1                        | 2.4                   | 4.2                    | 0.57:1       | = wt       | delay                |
| <i>cdc7-as3</i> [5hr]                      | not tested                       | = wt               | not tested                   | 1                     | 1.3                    | 0.78:1       | none       | none                 |
| <i>hrr25-as cdc7-as3</i> [5hr]             | not tested                       | = wt               | not tested                   | 0.76                  | 1                      | 0.67:1       | none       | none                 |

159 <sup>a</sup> Average IH:IS ratio is shown for time points when dHJs were at maximal levels.160 <sup>b</sup> Data are shown only for time points when CO and NCO were at maximal levels.

161
